# Supplementary material for: Highly efficient production and purification of fructoseviaglucose isomerization by calcium chloride and triethylamine
Source: Royal Society of Chemistry journal article supplement (doi:10.1039/d3gc01141k), 2023-01-01
Supplement: d3gc01141k1.pdf [file d3gc01141k1.pdf]

## Highly efficient production and purification of fructose via glucose isomerization by calcium chloride and triethylamine

Zhaohui Guo,<sup>a,b</sup> Christian Marcus Pedersen,<sup>c</sup> Honghong Chang,<sup>d</sup> Yingxiong Wang,<sup>\*a,e</sup> and Yan Qiao<sup>\*a,b</sup>

<sup>a</sup> *State Key Laboratory of Coal Conversion, Institute of Coal Chemistry, Chinese Academy of Sciences, 27 South Taoyuan Road, Taiyuan 030001, China*

<sup>b</sup> *Center of Materials Science and Optoelectronics Engineering, University of Chinese Academy of Sciences, Beijing 100049, China*

<sup>c</sup> *Department of Chemistry, University of Copenhagen, Universitetsparken 5, DK-2100 Copenhagen, Denmark*

<sup>d</sup> *Shanxi Tihondan Pharmaceutical Technology Co., Ltd., Jinzhong 030600, China*

<sup>e</sup> *College of Chemistry, Taiyuan University of Technology, 79 Yingze West Street, Wanbailin District, Taiyuan 030024, China*

\* Corresponding Author. E-mail addresses: wangyingxiong@tyut.edu.cn (Y. Wang), qiaoy@sxicc.ac.cn (Y. Qiao).

## NMR section

In DEPT135 NMR spectrum, the phase of the signals corresponding to -CH<sub>3</sub> and -CH is different from the signals corresponding to -CH<sub>2</sub>. The signal of -CH<sub>3</sub> and -CH are upward, and the signal of -CH<sub>2</sub> is downward, the quaternary carbon atom not attached to hydrogen show no signal.

<sup>1</sup>H-<sup>13</sup>C HSQC NMR spectrum shows the signals that <sup>13</sup>C and <sup>1</sup>H correlated points. In phase sensitive HSQC NMR, the peaks from -CH or -CH<sub>3</sub> are different from -CH<sub>2</sub> in phase, which define as two different colors on the spectrum.

DOSY (Diffusion ordered spectroscopy) experiments were performed with the Bruker standard bipolar pulse longitudinal eddy current delay (BPPLD) pulse sequence. The relaxation delay time was 2000 ms, and the diffusion time ( $\Delta$ ) was 100–300 ms according to the properties of samples. The duration of the pulse field gradient ( $\delta/2$ ) was adjusted to be in the range of 1000–2000  $\mu$ s in order to obtain 2–5% residual signal with the maximum gradient strength. The delay for gradient recovery was 0.2 ms, and the eddy current delay was 5 ms. The gradient strength was incremented in 16 steps from 2% to 95% of its maximum value in a linear ramp.

$$D = \frac{kT}{6\pi\eta r_s}$$

According to the Stokes-Einstein equation:

in which  $k$  is the Boltzmann constant,  $T$  is the temperature,  $\eta$  is the viscosity of the liquid, and  $r_s$  is the hydrodynamic radius of the molecule. The obtained diffusion coefficient ( $D$ ) value of a species in solution from DOSY experiment is dependent on the molecular weight and size.

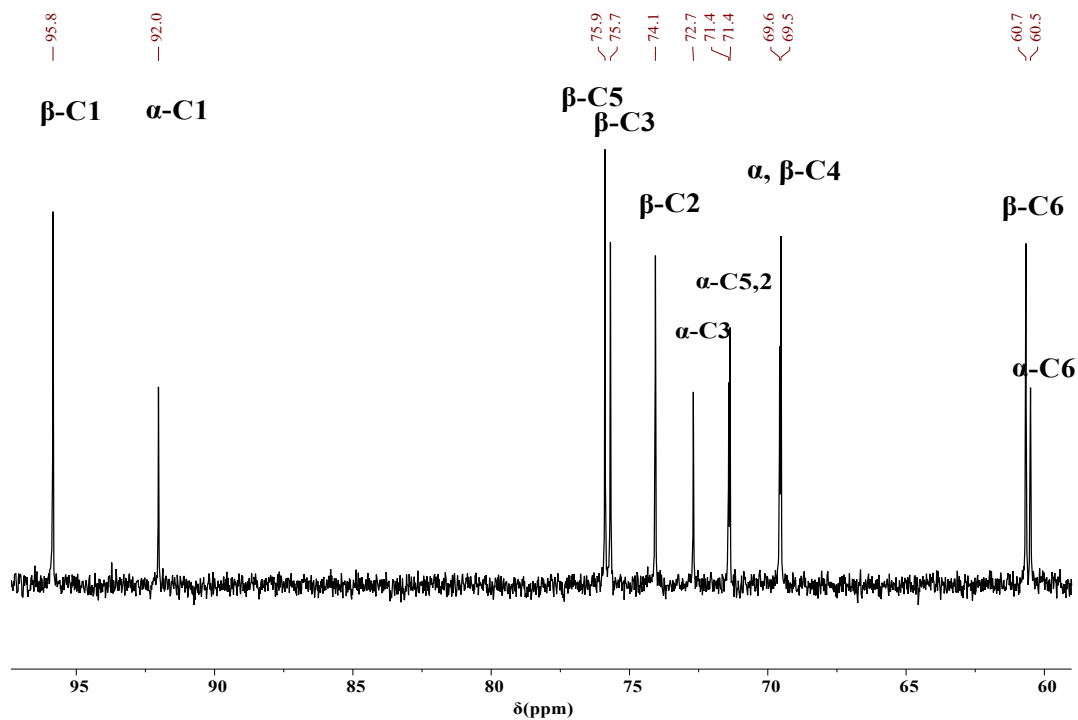

Figure S1.  $^{13}\text{C}$  NMR spectrum for glucose in  $\text{D}_2\text{O}$ .

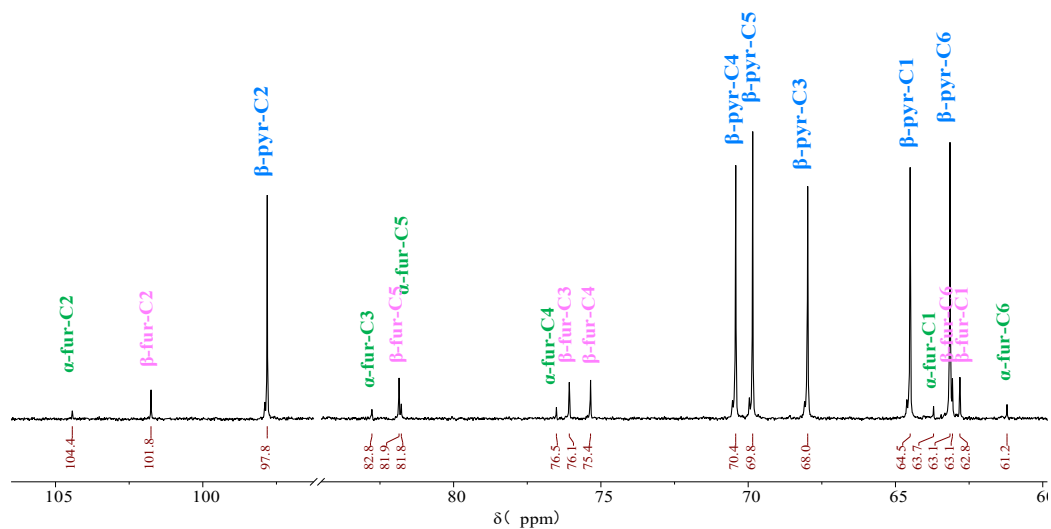

Figure S2.  $^{13}\text{C}$  NMR spectrum for fructose in  $\text{methanol-d}_4$ . Conditions: 50 mg fructose in 0.5 mL  $\text{methanol-d}_4$ , the supernatant of the dissolved fraction was taken,  $n_s = 1024$ .

\* The signals we labelled are three main tautomeric forms of fructose in  $\text{methanol-d}_4$  and which are possible tautomeric forms in our reaction system.

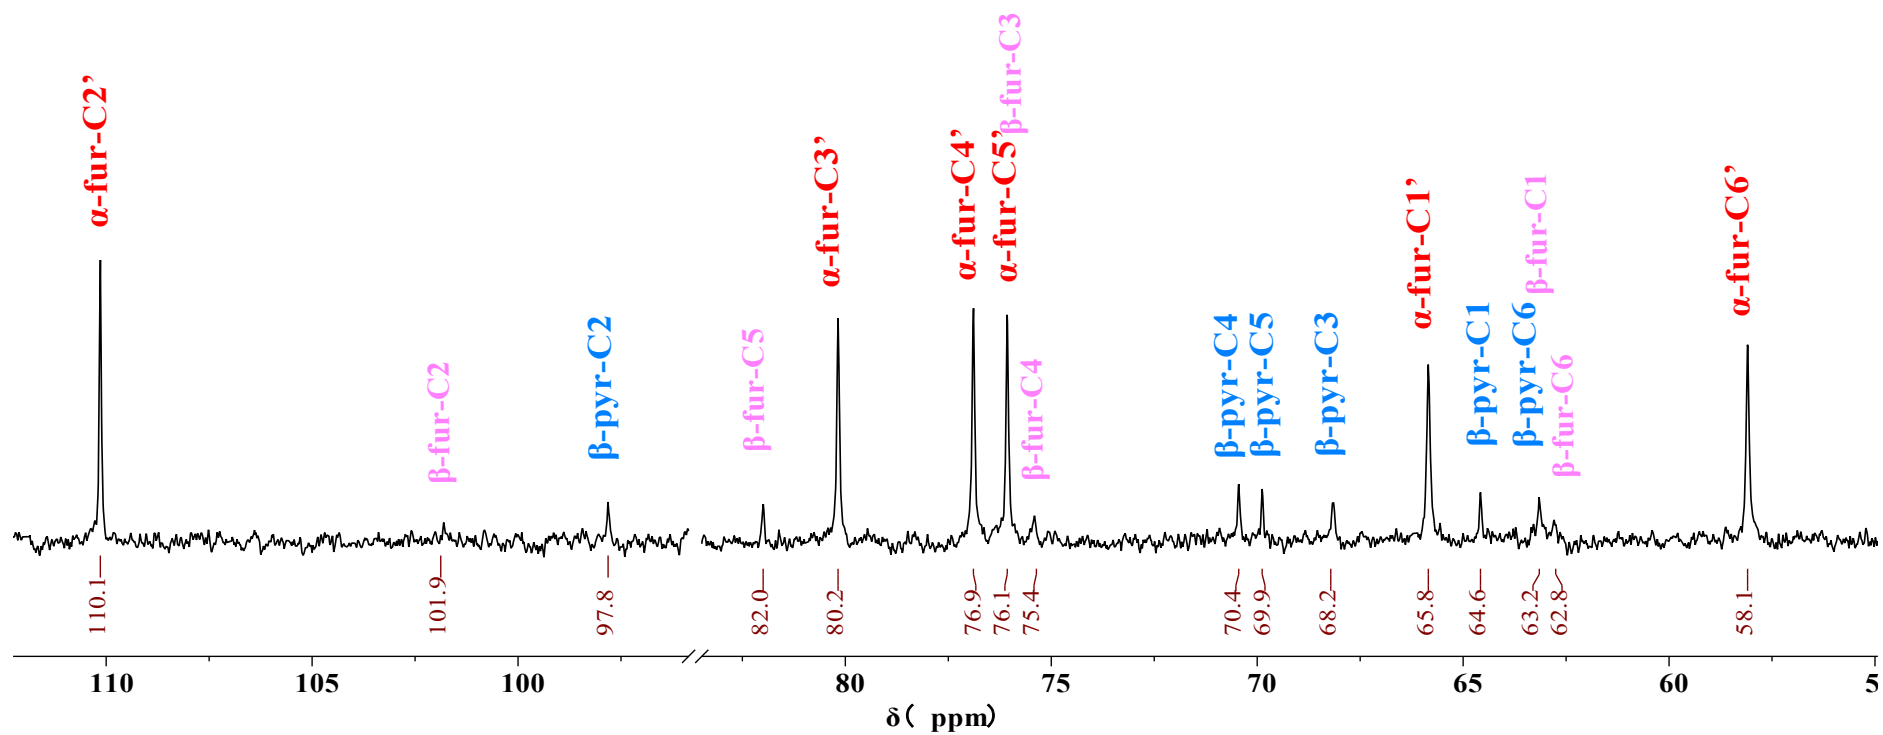

Figure S3.  $^{13}\text{C}$  NMR spectrum for fructose with  $\text{CaCl}_2$  and  $\text{Et}_3\text{N}$  in methanol- $\text{d}_4$ . Conditions: 50 mg fructose with equimolar  $\text{CaCl}_2$  and  $\text{Et}_3\text{N}$  in 0.5 mL methanol- $\text{d}_4$ , ns = 1024.

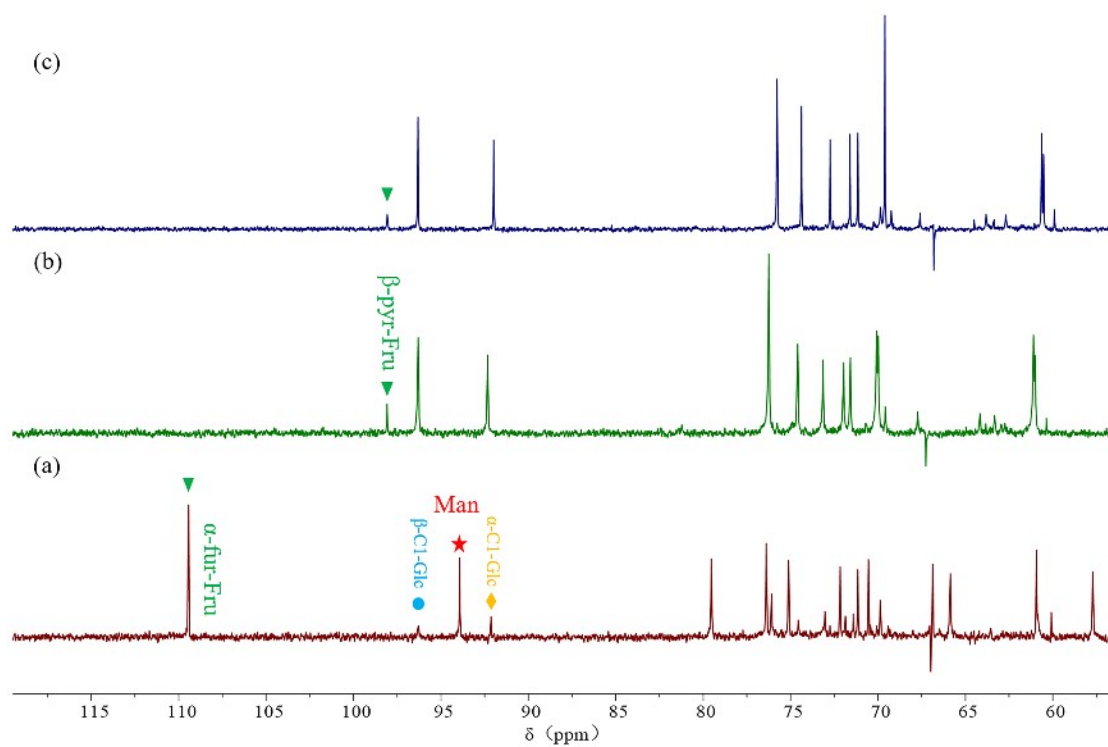

Figure S4.  $^{13}\text{C}$  NMR spectra of the reaction mixture where glucose conversion is promoted by (a)  $\text{CaCl}_2$  and  $\text{Et}_3\text{N}$ , (b)  $\text{MgCl}_2$  and  $\text{Et}_3\text{N}$  (c)  $\text{BaCl}_2$  and  $\text{Et}_3\text{N}$ . Reaction conditions: 100 mg glucose with equimolar metal salts and  $\text{Et}_3\text{N}$  as reagents in 1 mL methanol at  $65^\circ\text{C}$  for 1.5 h.

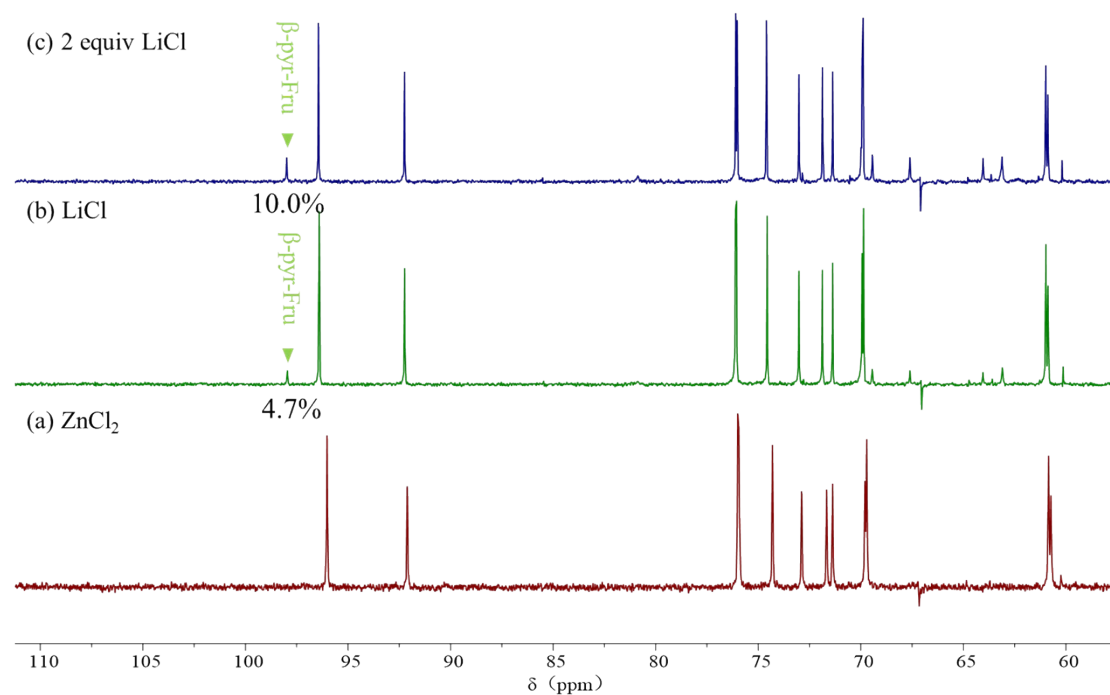

Figure S5.  $^{13}\text{C}$  NMR spectra of the reaction mixture where glucose conversion is promoted by (a) equimolar  $\text{ZnCl}_2$  and  $\text{Et}_3\text{N}$ , (b) equimolar  $\text{LiCl}$  and  $\text{Et}_3\text{N}$ , (c) 2 equivalent  $\text{LiCl}$  and equimolar  $\text{Et}_3\text{N}$ . Reaction conditions: 100 mg glucose with metal salts and  $\text{Et}_3\text{N}$  in 1 mL methanol at  $65^\circ\text{C}$  for 1.5 h.

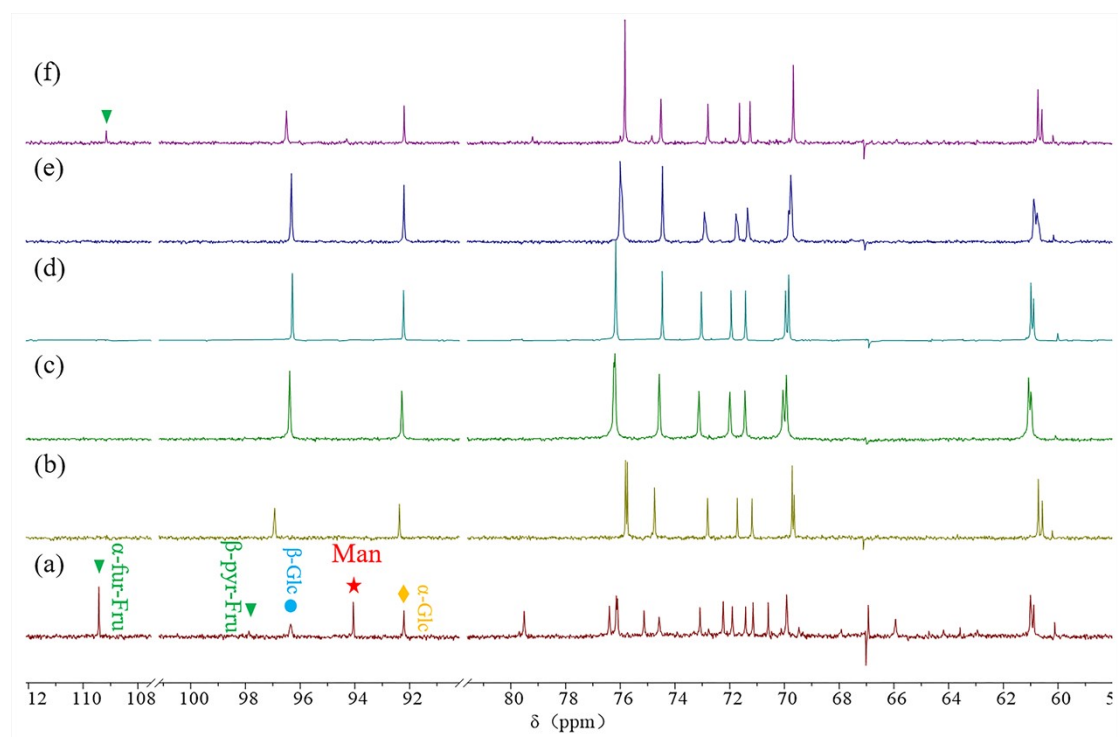

Figure S6.  $^{13}\text{C}$  NMR spectra of the reaction mixture where glucose conversion is promoted by (a)  $\text{Ca}(\text{NO}_3)_2$ , (b)  $\text{Ca}(\text{OAc})_2$ , (c)  $\text{CaSO}_4$ , (d)  $\text{Ca}(\text{HPO}_4)_2$ , (e)  $\text{Ca}_3(\text{PO}_4)_2$ , (f)  $\text{Ca}(\text{OAc})_2 + 2\text{NaCl}$  and  $\text{Et}_3\text{N}$ . Reaction conditions: 100 mg glucose with equimolar calcium salts and  $\text{Et}_3\text{N}$  as reagents in 1 mL methanol at  $65\text{ }^\circ\text{C}$  for 1.5 h.

Table S1. The effect of different metal salts in glucose isomerization

| Mental salt                                     | Y <sub>fru</sub> <sup>a</sup> (%) | Y <sub>man</sub> <sup>b</sup> (%) |
|-------------------------------------------------|-----------------------------------|-----------------------------------|
| CaCl <sub>2</sub>                               | 39                                | 29                                |
| MgCl <sub>2</sub>                               | 7                                 | - <sup>c</sup>                    |
| BaCl <sub>2</sub>                               | 9                                 | -                                 |
| Ca(NO <sub>3</sub> ) <sub>2</sub>               | 23                                | 18                                |
| Ca(OAc) <sub>2</sub>                            | -                                 | -                                 |
| Ca(OAc) <sub>2</sub> +2NaCl                     | 5                                 | 5                                 |
| CaSO <sub>4</sub>                               | -                                 | -                                 |
| Ca(HPO <sub>4</sub> ) <sub>2</sub>              | -                                 | -                                 |
| Ca <sub>3</sub> (PO <sub>4</sub> ) <sub>2</sub> | -                                 | -                                 |

Reaction conditions: 100 mg glucose with equimolar mental salts and Et<sub>3</sub>N in methanol at 65 °C for 1.5 h.

<sup>a</sup> The yield of fructose.

<sup>b</sup> The yield of mannose.

<sup>c</sup> Not detected under the present condition by NMR spectroscopy.



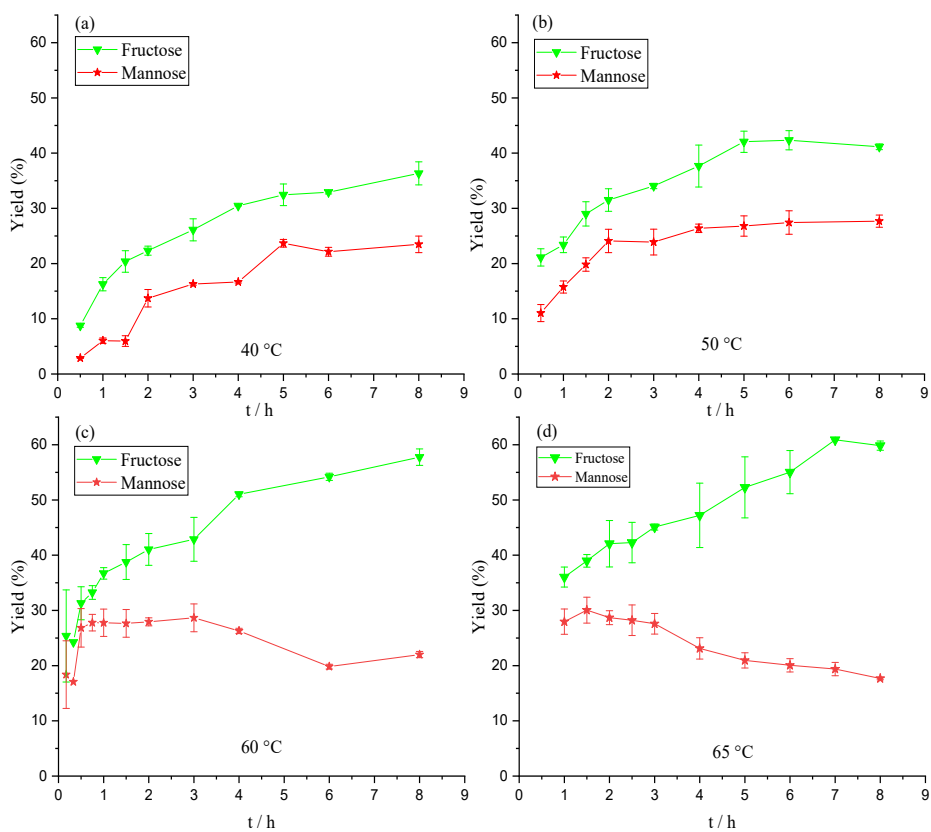

F

Figure S7. Isomerization of glucose in methanol at (a) 40 °C, (b) 50 °C, (c) 60 °C, (d) 65 °C. Reaction conditions: 100 mg/mL glucose in methanol with equimolar of CaCl<sub>2</sub> and Et<sub>3</sub>N.

Table S2. Isomerization of Glucose to fructose by various of chemical catalysts and reagents

| Catalyst                         | Solvent                  | T (°C) | t (min) | Yield | Selectivity | Ref |
|----------------------------------|--------------------------|--------|---------|-------|-------------|-----|
| CrCl <sub>3</sub>                | H <sub>2</sub> O         | 120    | 180     | 25.4  | 48.6        | 1   |
| AlCl <sub>3</sub>                | H <sub>2</sub> O         | 120    | 180     | 26.3  | 82.7        | 1   |
| SnCl <sub>4</sub>                | H <sub>2</sub> O         | 120    | 180     | 4.7   | 26          | 1   |
| ZnCl <sub>2</sub>                | H <sub>2</sub> O         | 120    | 15      | 0     | 0           | 2   |
| LiCl                             | H <sub>2</sub> O         | 120    | 15      | 7.7   | 81          | 2   |
| LiBr                             | H <sub>2</sub> O         | 120    | 15      | 30.3  | 58.5        | 2   |
| CaBr <sub>2</sub>                | H <sub>2</sub> O         | 120    | 15      | 22.4  | 23.7        | 2   |
| Ti-Beta                          | H <sub>2</sub> O         | 100    | 120     | 11    | 61          | 3   |
| Ti-Beta                          | MeOH                     | 100    | 120     | 8     | 22          | 4   |
| KOH                              | H <sub>2</sub> O         | 78     | 60      | 11    | 61          | 5   |
| morpholine                       | H <sub>2</sub> O         | 100    | 30      | 17    | 43          | 6   |
| piperazine                       | H <sub>2</sub> O         | 100    | 30      | 28    | 62          | 6   |
| ethylenediamine                  | H <sub>2</sub> O         | 100    | 30      | 25    | 60          | 6   |
| triethylamine                    | H <sub>2</sub> O         | 100    | 30      | 31    | 54          | 6   |
| piperidine                       | H <sub>2</sub> O         | 100    | 30      | 29    | 51          | 6   |
| pyrrolidine                      | H <sub>2</sub> O         | 100    | 30      | 29    | 59          | 6   |
| arginine                         | H <sub>2</sub> O         | 120    | 15      | 31    | 76          | 6   |
| CaO/ZrO <sub>2</sub>             | H <sub>2</sub> O         | 160    | 15      | 21    | 70          | 7   |
| NaAlO <sub>2</sub>               | H <sub>2</sub> O         | 55     | 180     | 41    | 70          | 8   |
| ZrC                              | H <sub>2</sub> O         | 120    | 20      | 34    | 76          | 9   |
| Al-hydrochar                     | acetone/H <sub>2</sub> O | 160    | 20      | 25    | 60          | 10  |
| CeO <sub>2</sub> /ATP            | H <sub>2</sub> O         | 100    | 200     | 36.4  | 79.1        | 11  |
| Mg-C <sub>3</sub> N <sub>4</sub> | H <sub>2</sub> O         | 80     | 240     | 32    | 84          | 12  |
| aniline                          | H <sub>2</sub> O         | 90     | 120     | 10.6  | 67.7        | 13  |
| acetoxime                        | H <sub>2</sub> O         | 90     | 120     | 7.6   | 24.8        | 13  |
| diacetyldioxime                  | H <sub>2</sub> O         | 90     | 120     | 10.3  | 54.6        | 13  |
| diacetylmonoxime                 | H <sub>2</sub> O         | 90     | 120     | 24.3  | 52.0        | 13  |
| Sn-Beta                          | H <sub>2</sub> O         | 120    | 60      | 46    | 70          | 3   |
| Sn-Al-Beta                       | H <sub>2</sub> O         | 120    | 60      | 43    | 65          | 3   |
| H-USY                            | MeOH/H <sub>2</sub> O    | 120    | 60      | 55    | 76          | 14  |
| Mg-Al Hydrotalcite               | MeOH                     | 100    | 300     | 51    | 72          | 15  |
| Al-MOF                           | EtOH                     | 120    | 240     | 52    | 64          | 16  |
| amidoximated polyacrylonitrile   | H <sub>2</sub> O         | 85     | 300     | 48.9  | 98.6        | 13  |
| Modified Zirconium UiO-66        | i-PrOH/H <sub>2</sub> O* | 90     | -       | 56    | 72          | 17  |
| Sn-SPP(186)                      | EtOH/H <sub>2</sub> O*   | 90     | 1800    | 65    | 74          | 18  |

\* Hydrolysis is required after the reaction.

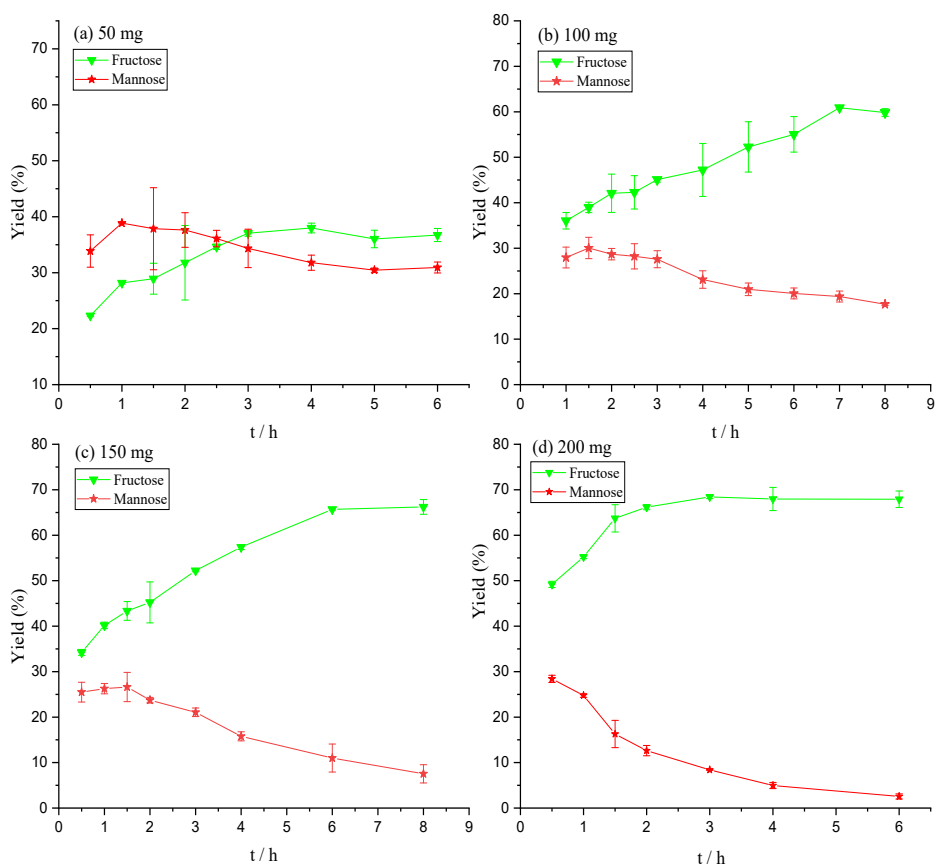

Figure S8. The effect of initial glucose concentration on isomerization. (a) 50 mg/mL, (b) 100 mg/mL, (c) 150 mg/mL, (d) 200 mg/mL. Reaction conditions: different concentration of glucose in methanol with equimolar  $\text{CaCl}_2$  and  $\text{Et}_3\text{N}$  at 65 °C.

Table S3. The effect of the ratio between CaCl<sub>2</sub> and glucose on isomerization

| t / h | 0.5 CaCl <sub>2</sub>   |                         | 1.0 CaCl <sub>2</sub>   |                         | 1.5 CaCl <sub>2</sub>   |                         | 2.0 CaCl <sub>2</sub>   |                         |
|-------|-------------------------|-------------------------|-------------------------|-------------------------|-------------------------|-------------------------|-------------------------|-------------------------|
|       | Y <sub>fru</sub><br>(%) | Y <sub>man</sub><br>(%) |
| 0.5   | 18                      | 20                      | 29                      | 27                      | 43                      | 28                      | 52                      | 24                      |
| 1.0   | 20                      | 21                      | 36                      | 28                      | 46                      | 29                      | 60                      | 16                      |
| 1.5   | 23                      | 22                      | 39                      | 30                      | 50                      | 24                      | 62                      | 16                      |
| 2.0   | 24                      | 23                      | 42                      | 29                      | 56                      | 21                      | 62                      | 12                      |
| 3.0   | 26                      | 24                      | 45                      | 28                      | 58                      | 15                      | 62                      | 13                      |

Reaction conditions: 100 mg/mL glucose with different ratio of CaCl<sub>2</sub> and equimolar Et<sub>3</sub>N as reagents in methanol at 65 °C. \*Considering its solubility, the initial concentration of glucose was set as 100 mg/mL.

Table S4. The effect of the ratio between Et<sub>3</sub>N and glucose on isomerization

| t / h | 0.5 Et <sub>3</sub> N   |                         | 1.0 Et <sub>3</sub> N   |                         | 1.5 Et <sub>3</sub> N   |                         | 2.0 Et <sub>3</sub> N   |                         |
|-------|-------------------------|-------------------------|-------------------------|-------------------------|-------------------------|-------------------------|-------------------------|-------------------------|
|       | Y <sub>fru</sub><br>(%) | Y <sub>man</sub><br>(%) |
| 0.5   | 16                      | 13                      | 29                      | 27                      | 40                      | 32                      | 45                      | 26                      |
| 1.0   | 18                      | 14                      | 36                      | 28                      | 42                      | 26                      | 54                      | 22                      |
| 1.5   | 21                      | 15                      | 39                      | 30                      | 53                      | 18                      | 59                      | 13                      |
| 2.0   | 23                      | 18                      | 42                      | 29                      | 60                      | 14                      | 65                      | 9                       |
| 3.0   | 25                      | 18                      | 45                      | 28                      | 61                      | 11                      | 61                      | 4                       |

Reaction conditions: 100 mg/mL glucose with different ratio of Et<sub>3</sub>N and equimolar CaCl<sub>2</sub> as reagents in methanol at 65 °C.

Table S5. The effect of solvent in glucose isomerization with CaCl<sub>2</sub> and Et<sub>3</sub>N as reagents

| Solvent         | Temperature/ <sup>o</sup><br>C | C <sub>glc</sub> <sup>a</sup> (%) | Y <sub>fru</sub> <sup>b</sup> (%) |
|-----------------|--------------------------------|-----------------------------------|-----------------------------------|
| water           | 65                             | 25                                | 18                                |
| ethanol         | 65                             | 81                                | 42                                |
| ethylene glycol | 65                             | * <sup>c</sup>                    | - <sup>d</sup>                    |
| γ-butyrolactone | 65                             | *                                 | -                                 |
| γ-butyrolactone | 85                             | 8                                 | 5                                 |
| γ-butyrolactone | 135                            | 43                                | 19                                |

Reaction conditions: 100 mg glucose with equimolar CaCl<sub>2</sub> and Et<sub>3</sub>N as reagents.

<sup>a</sup> The conversion of glucose.

<sup>b</sup> The yield of fructose.

<sup>c</sup> Unable to determine the exact value of conversion.

<sup>d</sup> Not detected under the present condition by NMR technology.

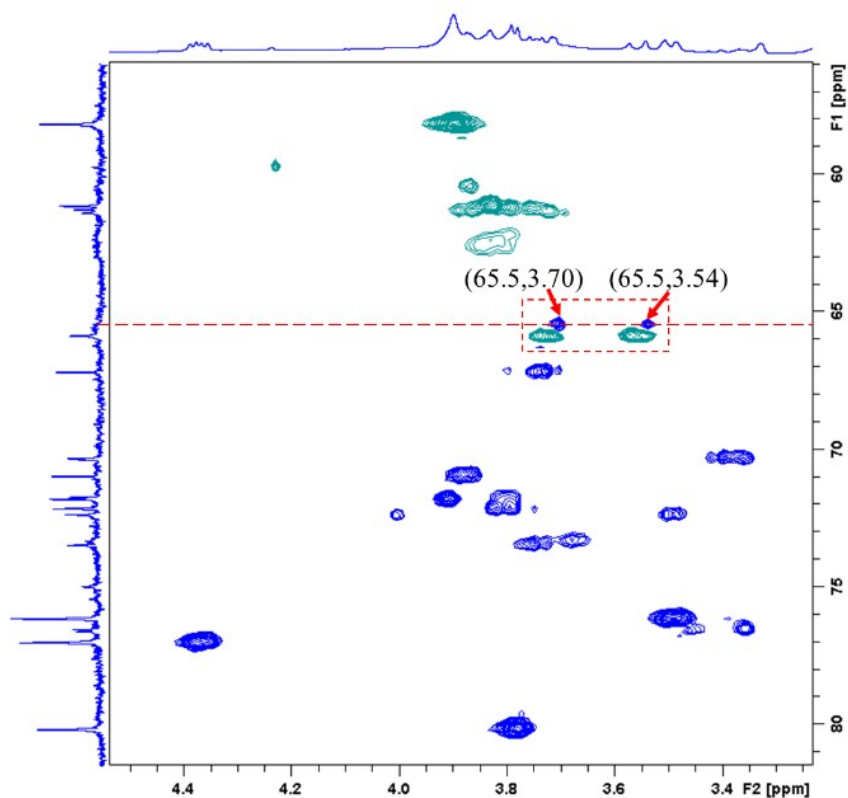

Figure S9.  $^1\text{H}$ - $^{13}\text{C}$  HSQC NMR spectrum of sugar fractions obtained from the isomerization of glucose promoted by  $\text{Et}_3\text{N}$  and  $\text{CaCl}_2$  in methanol- $\text{d}_4$ .

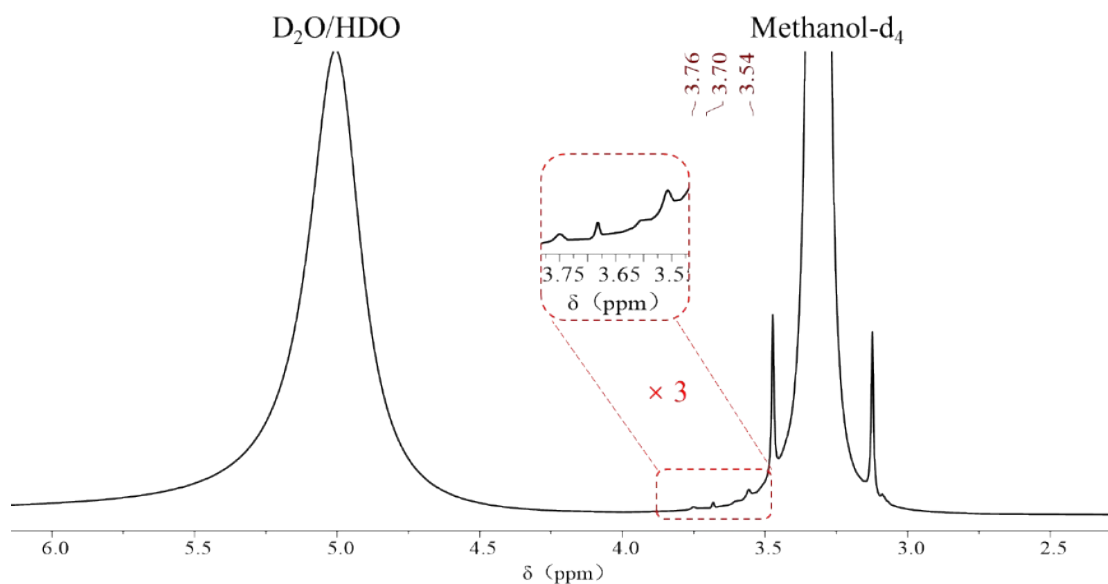

Figure S10.  $^2\text{H}$  NMR spectrum of reaction mixture obtained from the isomerization of glucose promoted by  $\text{Et}_3\text{N}$  and  $\text{CaCl}_2$  in methanol- $\text{d}_4$ .

### Path I

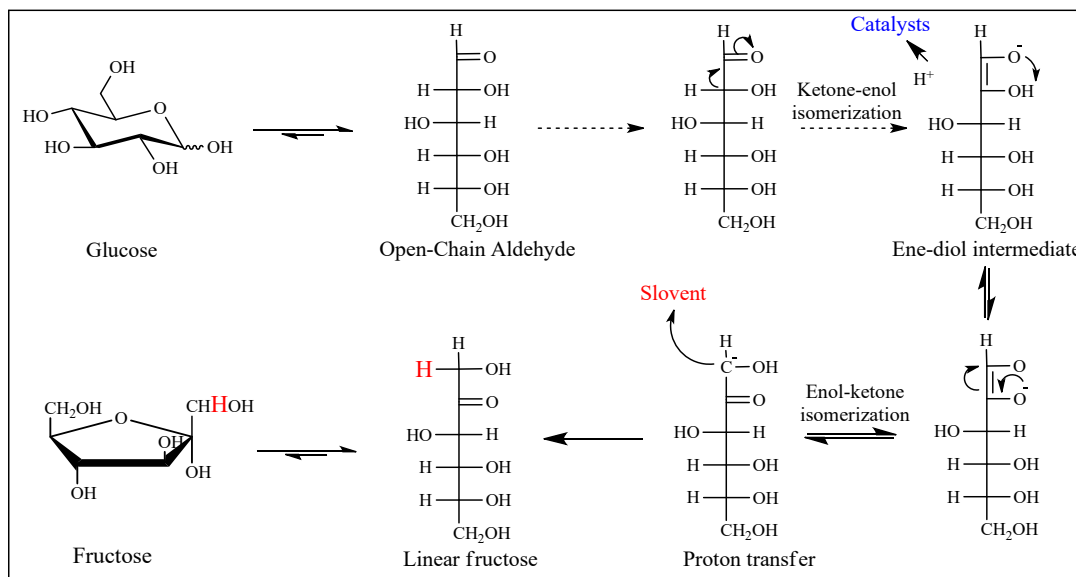

### Path II

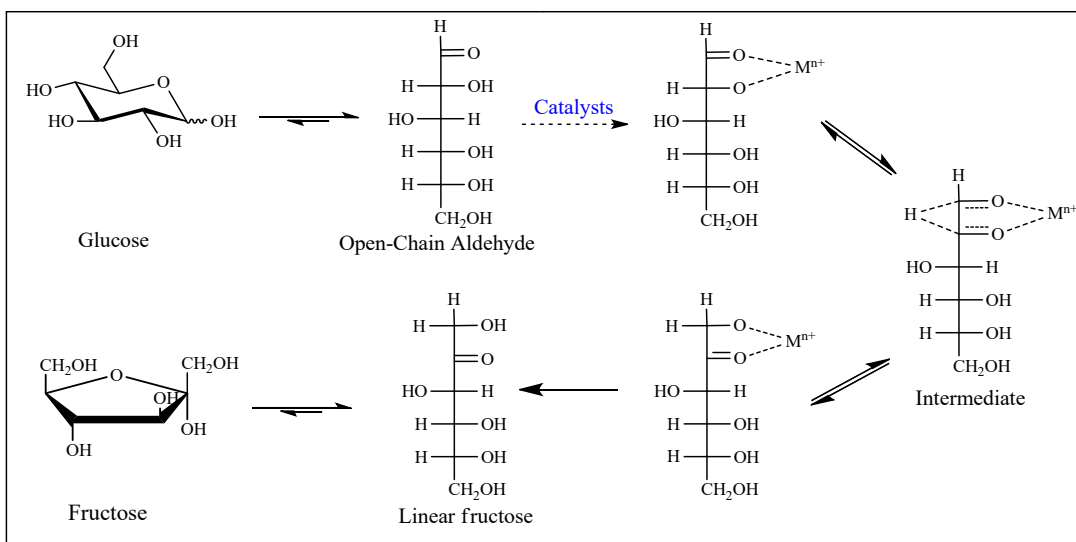

Scheme S1. Proposed glucose isomerization reaction pathways.

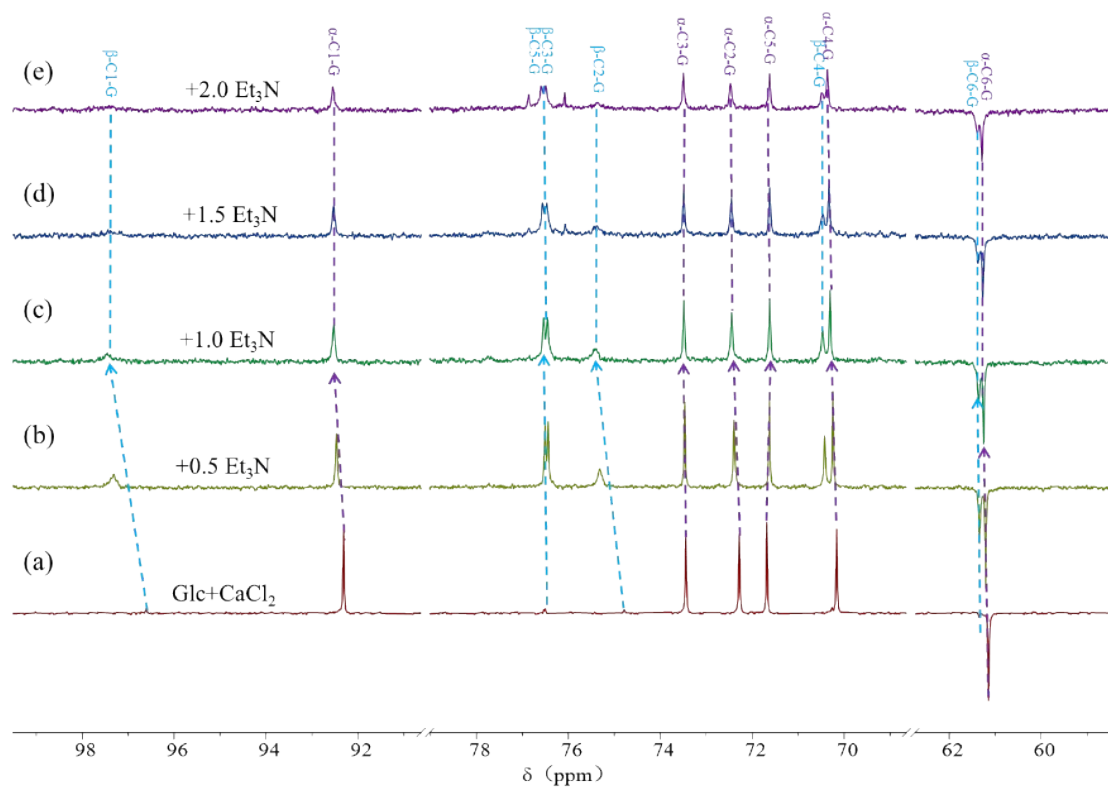

Figure S11. The DEPT135 stacked NMR spectra with different molar ratios of Et<sub>3</sub>N to glucose- CaCl<sub>2</sub> in methanol-d<sub>4</sub>.

Conditions: 50 mg/mL glucose and equimolar CaCl<sub>2</sub> with different molar ratios of Et<sub>3</sub>N in methanol-d<sub>4</sub>, 25 °C.



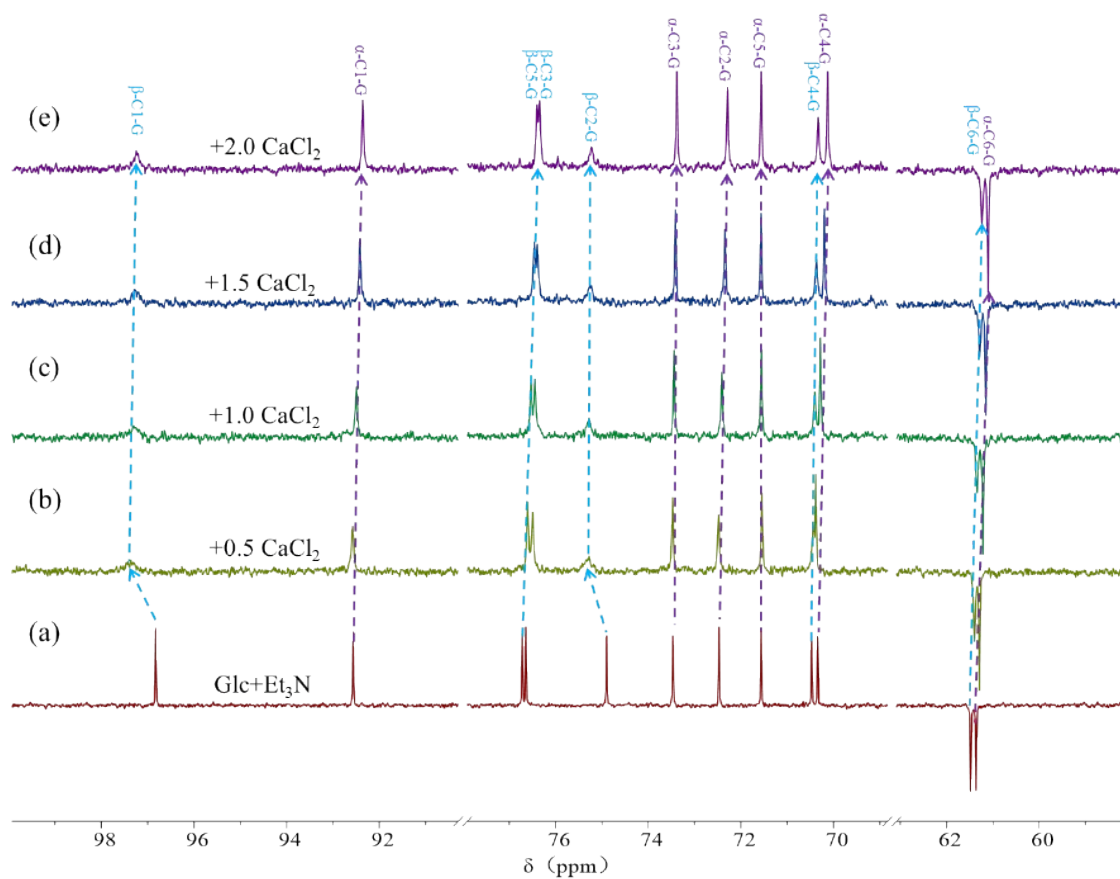

Figure S12. The DEPT135 stacked NMR spectra with different molar ratios of CaCl<sub>2</sub> to glucose-Et<sub>3</sub>N in methanol-d<sub>4</sub>.

Conditions: 50 mg/mL glucose and equimolar Et<sub>3</sub>N with different molar ratios of CaCl<sub>2</sub> in methanol-d<sub>4</sub>, 25 °C.

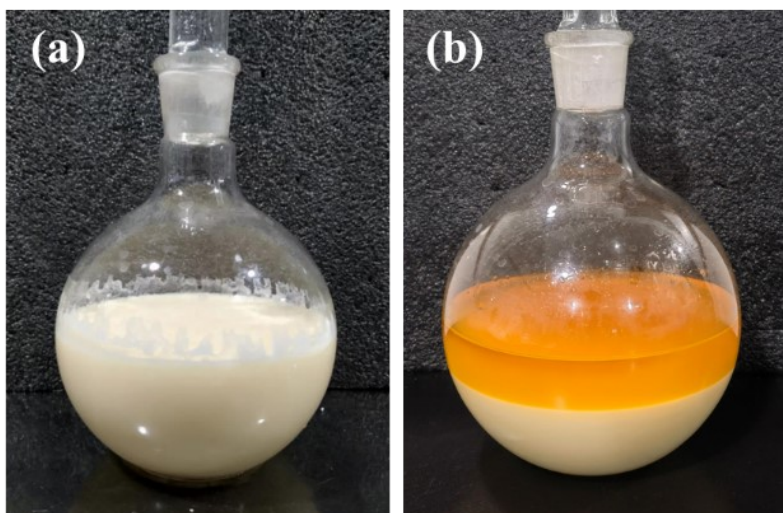

Figure S13. Photograph of the reaction mixtures. (a) The mixture that just finished reacting; (b) The mixture that cooled for a while.

Reaction conditions: 5 g glucose with equimolar  $\text{Et}_3\text{N}$  and two equivalent  $\text{CaCl}_2$  as reagents at  $65\text{ }^\circ\text{C}$  in methanol for 1 h.

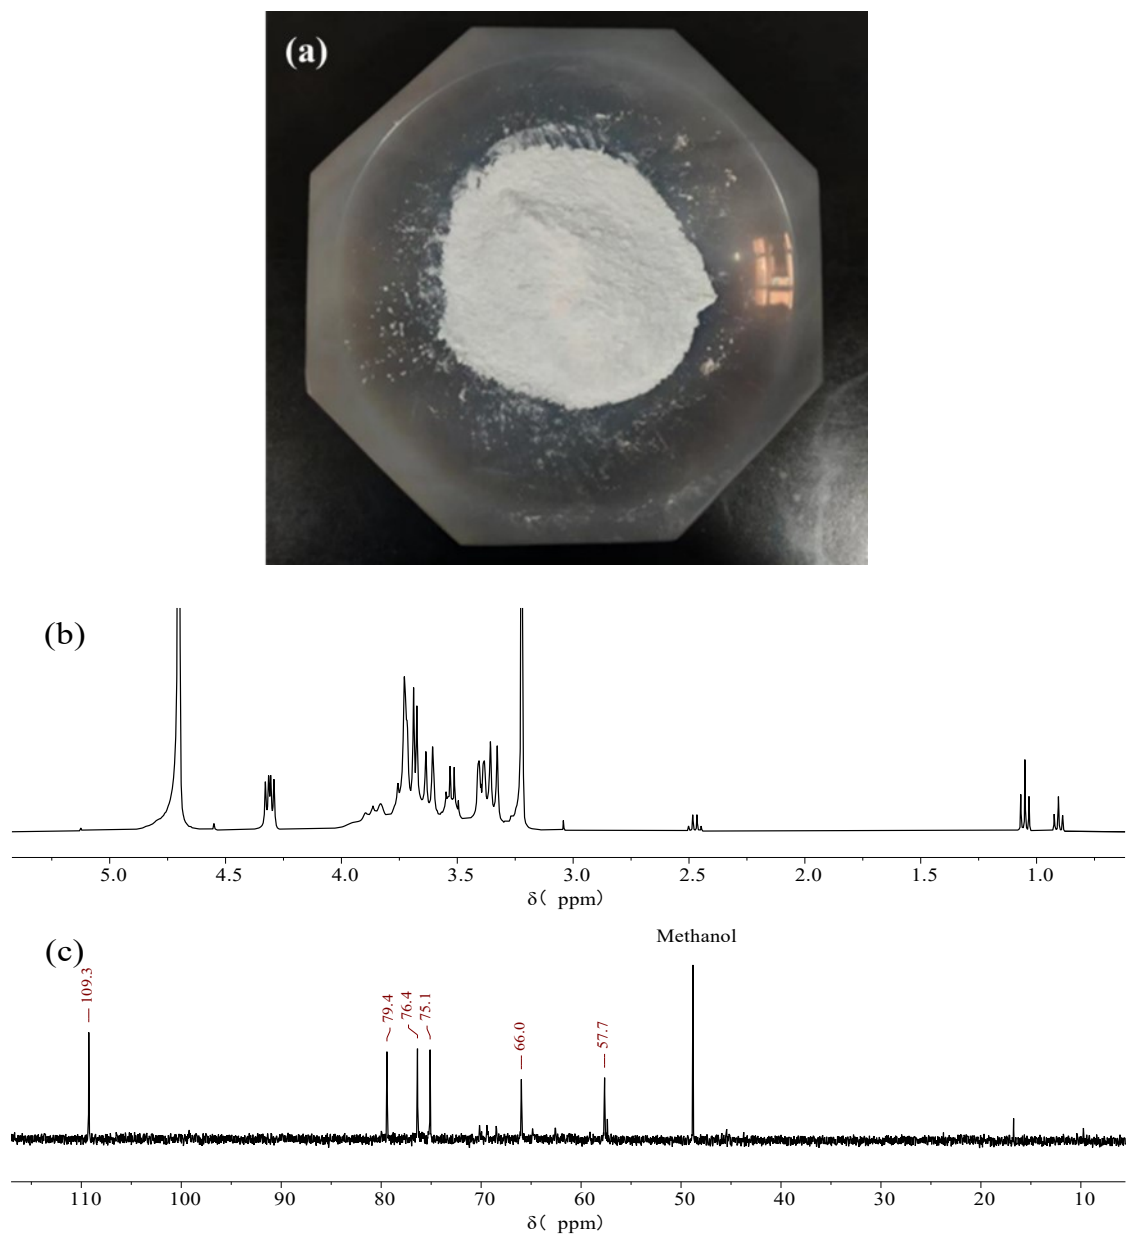

Figure S14. (a) Photograph, (b)  $^1\text{H}$  NMR spectrum, (c)  $^{13}\text{C}$  NMR spectrum of the dried sample.

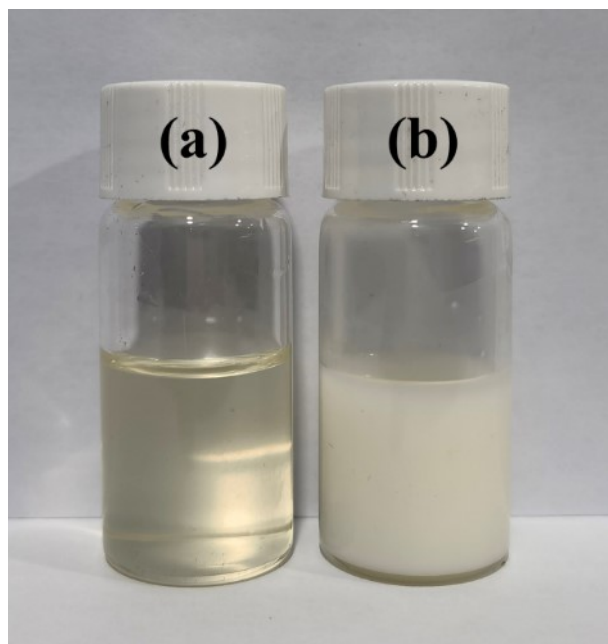

Figure S15. Photograph of the dried product dissolved in water. (a) the solution before bubbling  $\text{CO}_2$ ; (b) the solution after bubbling  $\text{CO}_2$ .

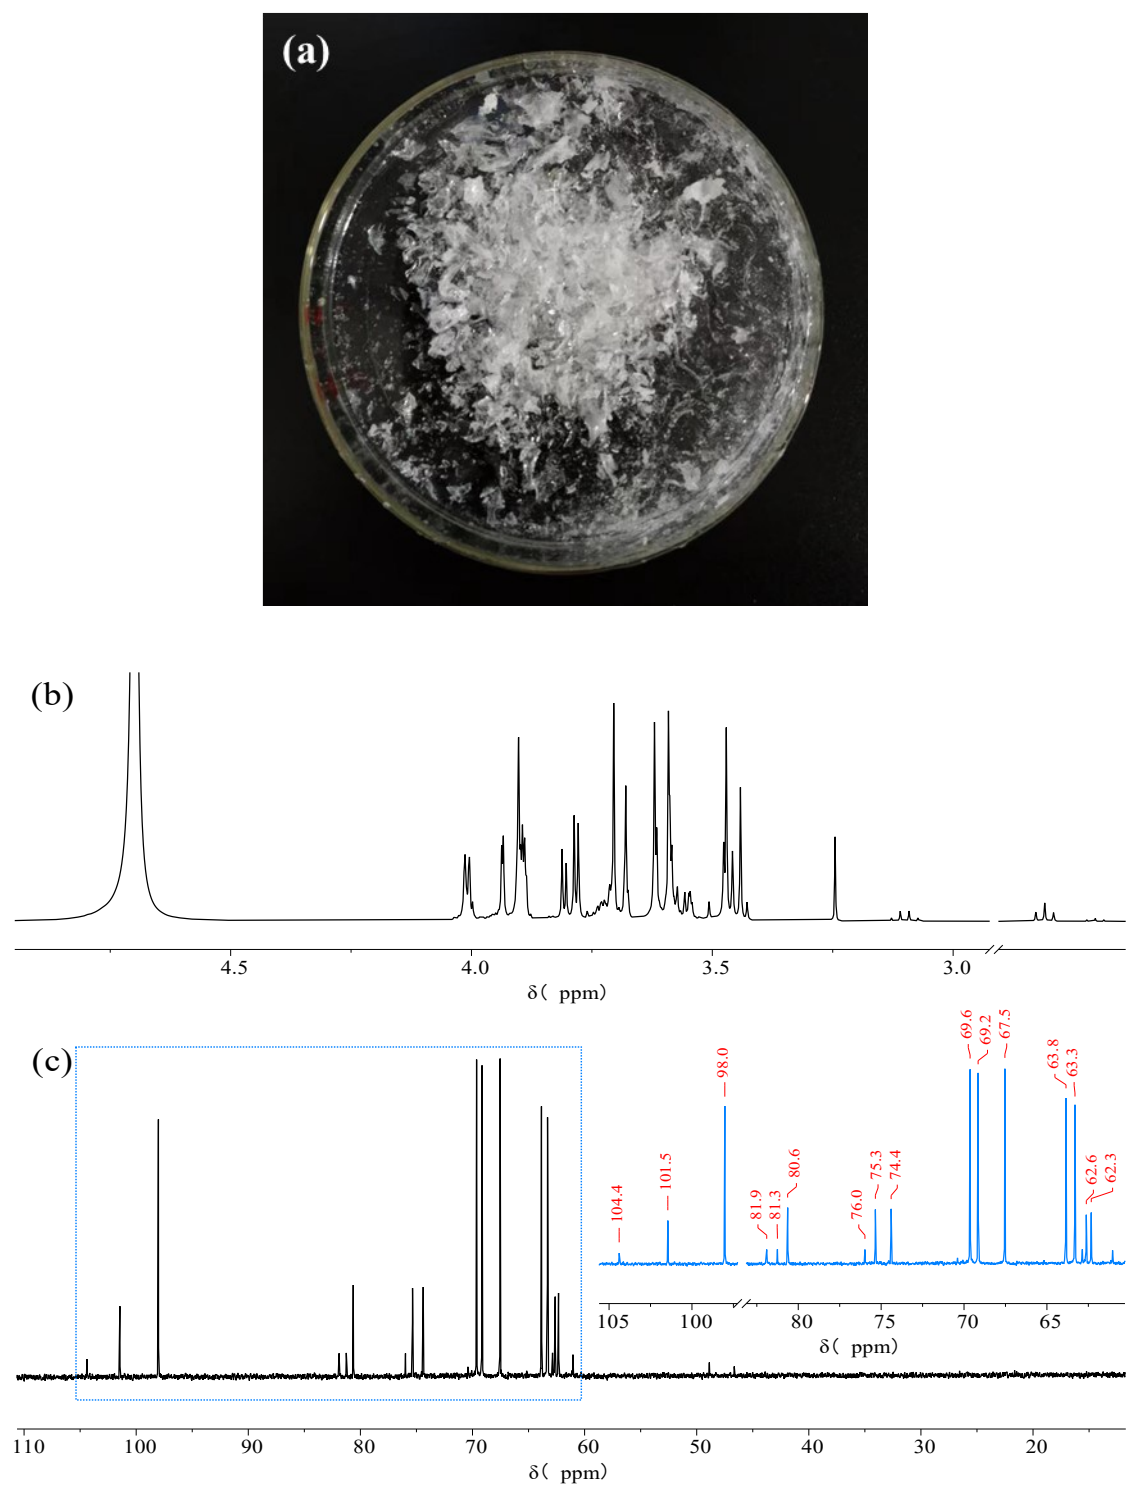

Figure S16. (a) Photograph, (b)  $^1\text{H}$  NMR spectrum, (c)  $^{13}\text{C}$  NMR spectrum of the purified fructose with 45% isolated yield.

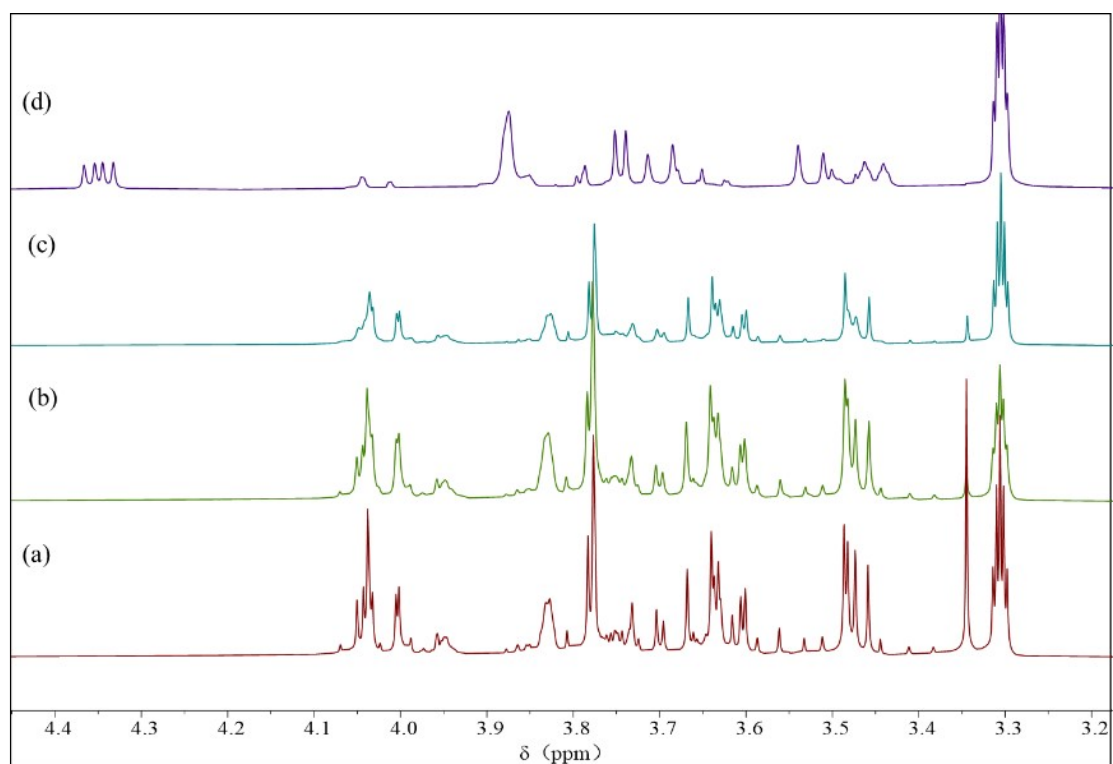

Figure S17. (a)  $^1\text{H}$  NMR spectrum of sugar fractions obtained from the (a) fructose, (b) fructose with equimolar  $\text{CaCl}_2$ , (c) fructose with equimolar  $\text{Et}_3\text{N}$ , (d) fructose with equimolar  $\text{CaCl}_2$  and  $\text{Et}_3\text{N}$ . Conditions: 5 mg fructose in 0.5 mL methanol- $\text{d}_4$  at 25  $^\circ\text{C}$ .

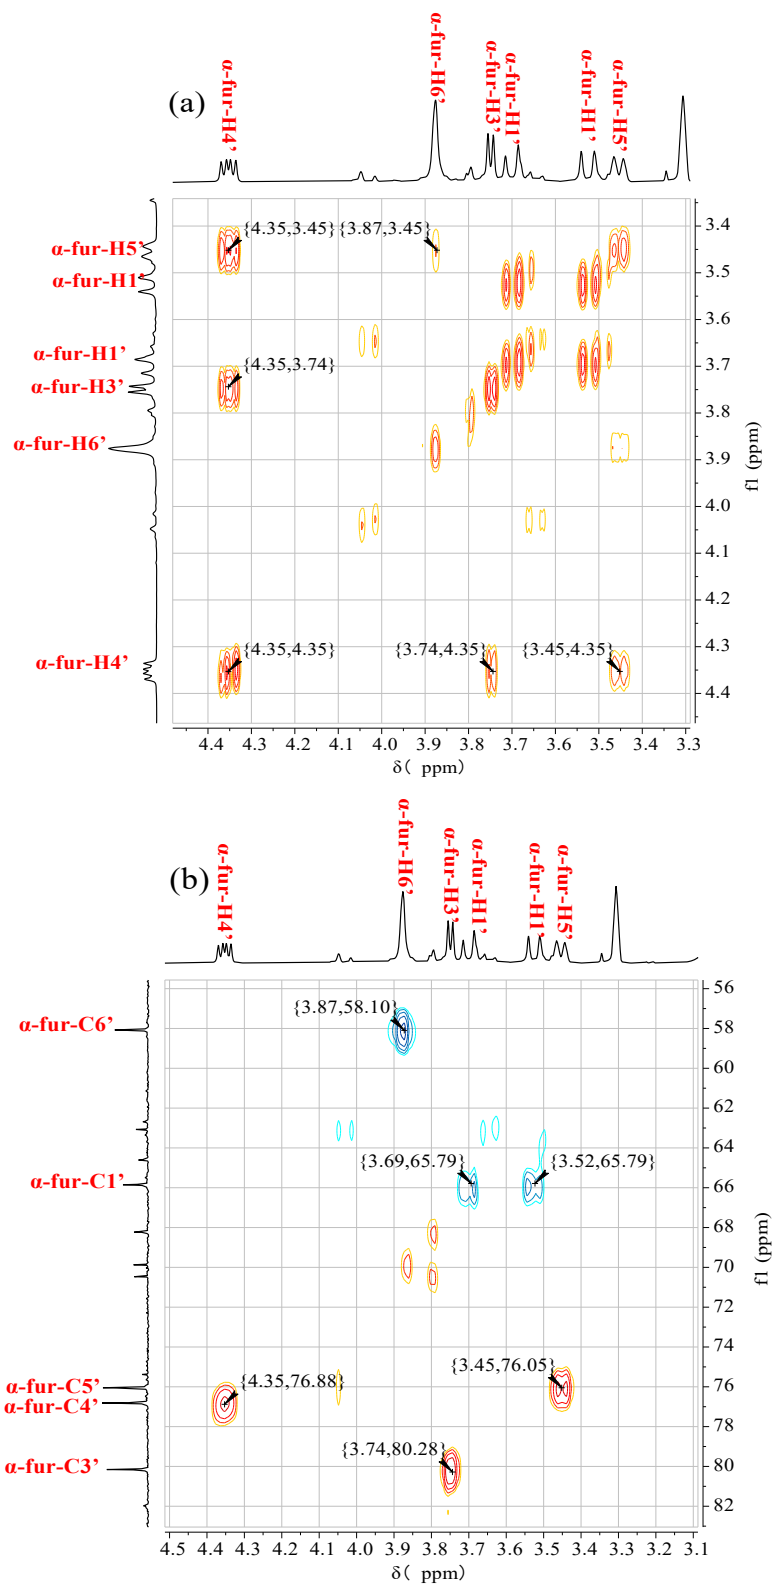

Figure S18. (a)  $^1\text{H}$ - $^1\text{H}$  COSY NMR, (b)  $^1\text{H}$ - $^{13}\text{C}$  HSQC NMR spectra of sugar fractions obtained from fructose mixed with  $\text{Et}_3\text{N}$  and  $\text{CaCl}_2$  in methanol- $\text{d}_4$ .

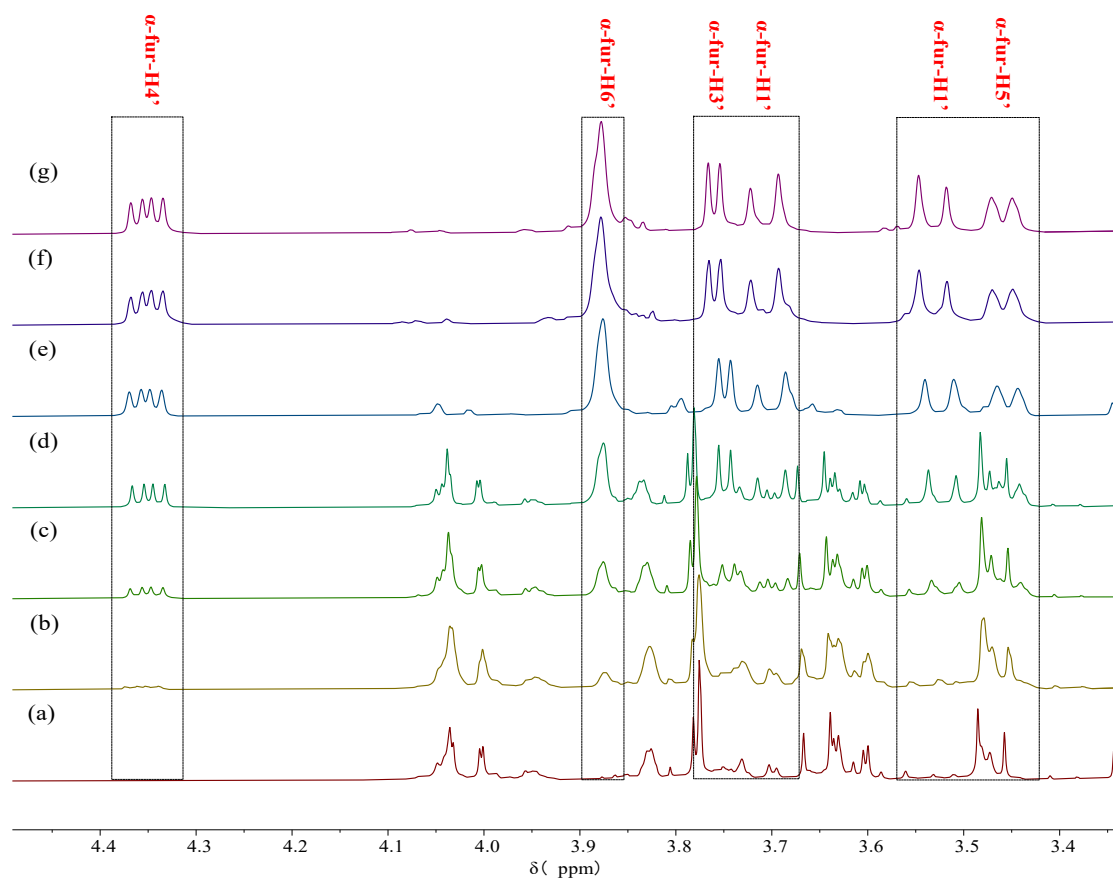

Figure S19. The  $^1\text{H}$  stacked NMR spectra with different molar ratios of  $\text{CaCl}_2$  to fructose in methanol- $\text{d}_4$ . (a) fructose:  $\text{CaCl}_2$  :  $\text{Et}_3\text{N}$  = 1:0:1, (b) fructose:  $\text{CaCl}_2$  :  $\text{Et}_3\text{N}$  = 1:0.1:1, (c) fructose:  $\text{CaCl}_2$  :  $\text{Et}_3\text{N}$  = 1:0.25:1, (d) fructose:  $\text{CaCl}_2$  :  $\text{Et}_3\text{N}$  = 1:0.5:1, (e) fructose:  $\text{CaCl}_2$  :  $\text{Et}_3\text{N}$  = 1: 1:1, (f) fructose:  $\text{CaCl}_2$  :  $\text{Et}_3\text{N}$  = 1:1.5:1, (g) fructose:  $\text{CaCl}_2$  :  $\text{Et}_3\text{N}$  = 1:2:1. Conditions: 12.5 mg/mL fructose in methanol- $\text{d}_4$ , 25  $^\circ\text{C}$ .



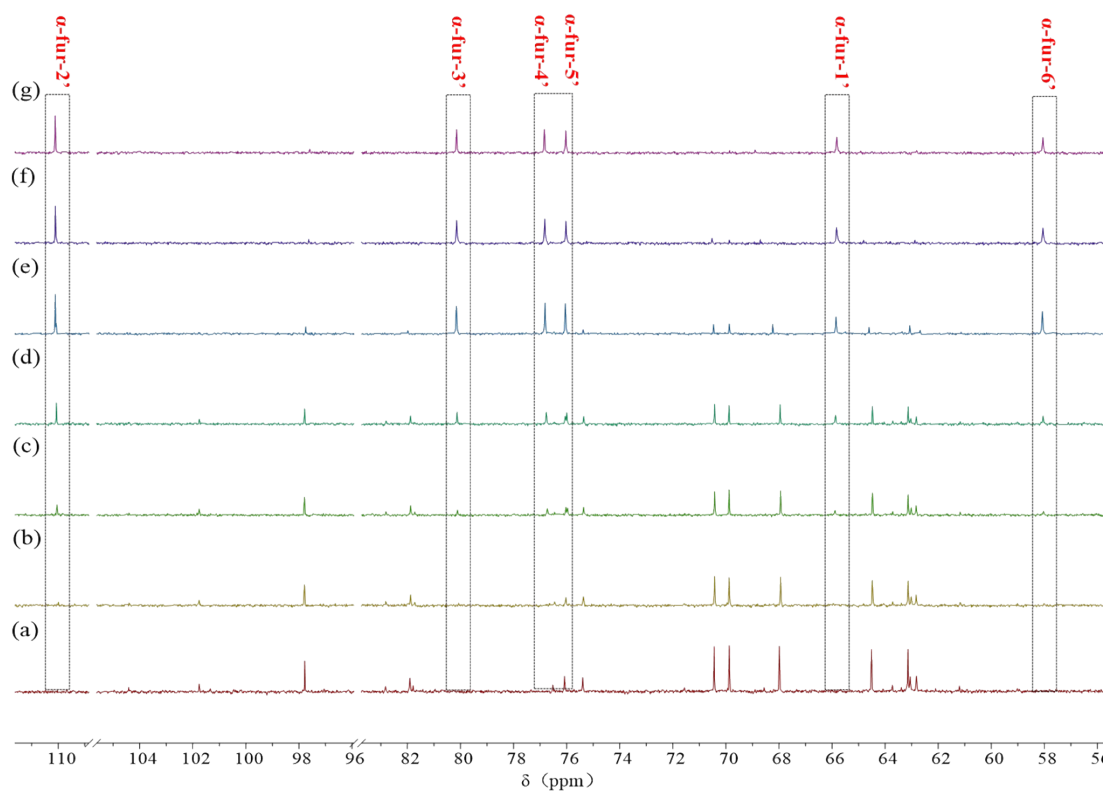

Figure S20. The  $^{13}\text{C}$  stacked NMR spectra with different molar ratios of  $\text{CaCl}_2$  to fructose in methanol- $\text{d}_4$ . (a) fructose:  $\text{Et}_3\text{N}$ :  $\text{CaCl}_2=1:1:0$ , (b) fructose:  $\text{Et}_3\text{N}$ :  $\text{CaCl}_2=1:1:0.1$ , (c) fructose:  $\text{Et}_3\text{N}$ :  $\text{CaCl}_2=1:1:0.25$ , (d) fructose:  $\text{Et}_3\text{N}$ :  $\text{CaCl}_2=1:1:0.5$ , (e) fructose:  $\text{Et}_3\text{N}$ :  $\text{CaCl}_2=1:1:1$ , (f) fructose:  $\text{Et}_3\text{N}$ :  $\text{CaCl}_2=1:1:1.5$ , (g) fructose:  $\text{Et}_3\text{N}$ :  $\text{CaCl}_2=1:1:2$ . Conditions: 12.5 mg/mL fructose in methanol- $\text{d}_4$ , 25  $^\circ\text{C}$ .

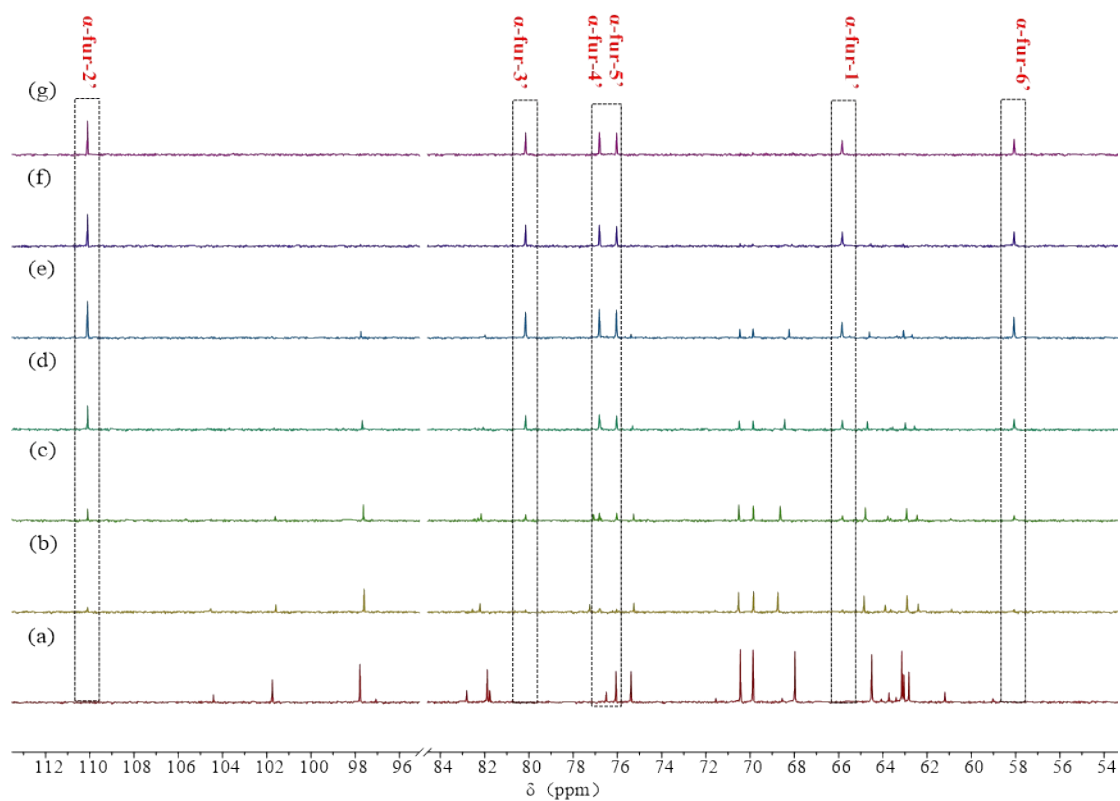

Figure S21. The  $^{13}\text{C}$  stacked NMR spectra with different molar ratios of  $\text{Et}_3\text{N}$  to fructose in methanol- $\text{d}_4$ . (a) fructose:  $\text{CaCl}_2$ :  $\text{Et}_3\text{N}$  = 1:1:0, (b) fructose:  $\text{CaCl}_2$ :  $\text{Et}_3\text{N}$  = 1:1:0.1, (c) fructose:  $\text{CaCl}_2$ :  $\text{Et}_3\text{N}$  = 1:1:0.25, (d) fructose:  $\text{CaCl}_2$ :  $\text{Et}_3\text{N}$  = 1:1:0.5, (e) fructose:  $\text{CaCl}_2$ :  $\text{Et}_3\text{N}$  = 1:1:1, (f) fructose:  $\text{CaCl}_2$ :  $\text{Et}_3\text{N}$  = 1:1:1.5, (g) fructose:  $\text{CaCl}_2$ :  $\text{Et}_3\text{N}$  = 1:1:2. Conditions: 12.5 mg/mL fructose in methanol- $\text{d}_4$ , 25  $^\circ\text{C}$ .

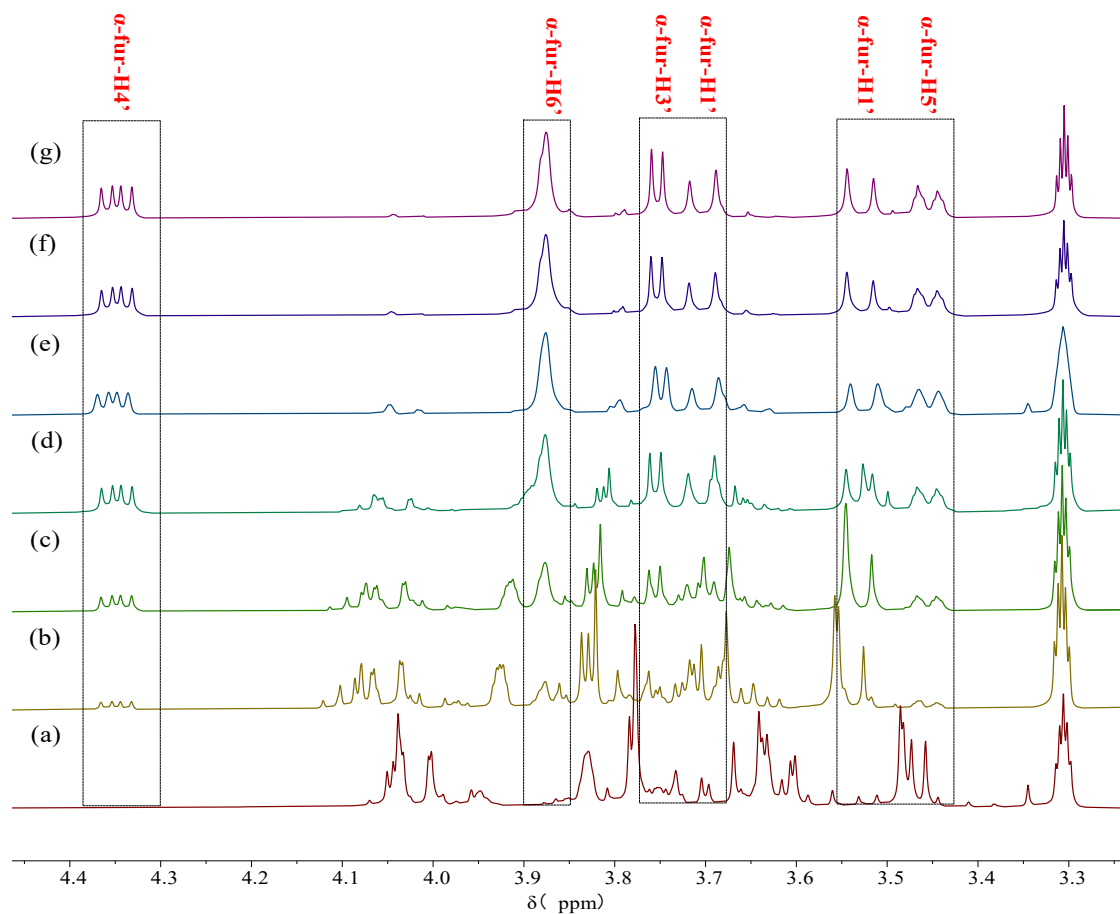

Figure S22. The <sup>1</sup>H stacked NMR spectra with different molar ratios of Et<sub>3</sub>N to fructose in methanol-d<sub>4</sub>. (a) fructose: CaCl<sub>2</sub>: Et<sub>3</sub>N = 1:1:0, (b) fructose: CaCl<sub>2</sub>: Et<sub>3</sub>N = 1:1:0.1, (c) fructose: CaCl<sub>2</sub>: Et<sub>3</sub>N = 1:1:0.25, (d) fructose: CaCl<sub>2</sub>: Et<sub>3</sub>N = 1:1:0.5, (e) fructose: CaCl<sub>2</sub>: Et<sub>3</sub>N = 1:1:1, (f) fructose: CaCl<sub>2</sub>: Et<sub>3</sub>N = 1:1:1.5, (g) fructose: CaCl<sub>2</sub>: Et<sub>3</sub>N = 1:1:2. Conditions: 12.5 mg/mL fructose in methanol-d<sub>4</sub>, 25 °C.

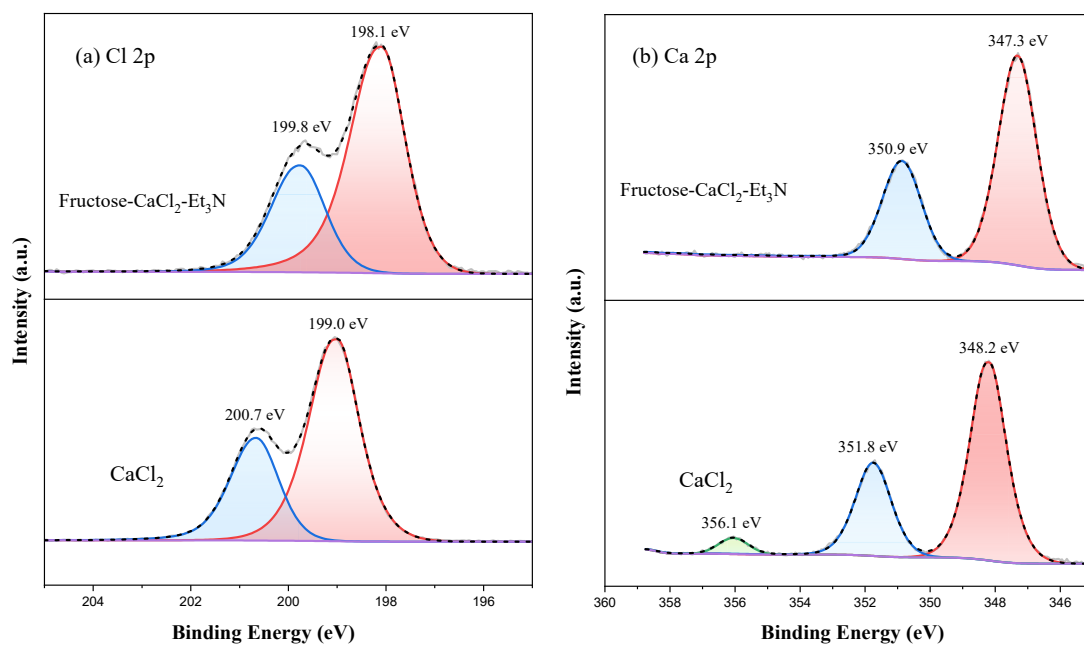

Figure S23. (a) Cl 2p and (b) Ca 2p XPS patterns of fructose-CaCl<sub>2</sub>-Et<sub>3</sub>N samples.

## References:

- S1. J. Q. Tang, X. W. Guo, L. F. Zhu and C. W. Hu, *ACS Catal.*, 2015, **5**, 5097-5103.
- S2. C. G. Yoo, N. Li, M. Swannell and X. Pan, *Green Chem.*, 2017, **19**, 4402-4411.
- S3. M. Liu, S. Jia, C. Li, A. Zhang, C. Song and X. Guo, *Chin. J. Catal.*, 2014, **35**, 723-732.
- S4. R. Gounder and M. E. Davis, *ACS Catal.*, 2013, **3**, 1469-1476.
- S5. A. P. C. K. J. M. de Bruijn, H. van Bekkum, *Recl. Trav. Chim. Pays-Bas*, 1987, **106**, 35-43.
- S6. C. Liu, J. M. Carraher, J. L. Swedberg, C. R. Herndon, C. N. Fleitman and J.-P. Tessonnier, *ACS Catal.*, 2014, **4**, 4295-4298.
- S7. H. Kitajima, Y. Higashino, S. Matsuda, H. Zhong, M. Watanabe, T. M. Aida and R. L. Smith, *Catal. Today*, 2016, **274**, 67-72.
- S8. S. Despax, B. Estrine, N. Hoffmann, J. Le Bras, S. Marinkovic and J. Muzart, *Catal. Commun.*, 2013, **39**, 35-38.
- S9. P. A. Son, S. Nishimura and K. Ebitani, *React. Kinet., Mech. Catal.*, 2013, **111**, 183-197.
- S10. J. Liu, X. Zhang, L. Yang, U. A. Danhassan, S. Zhang, M. Yang, K. Sheng and X. Zhang, *Sci. Total Environ.*, 2021, **777**, 146037.
- S11. B. Li, H. Jiang, X. Zhao, Z. Pei and Q. Zhang, *ChemistrySelect*, 2020, **5**, 14971-14977.
- S12. M. Laiq Ur Rehman, Q. Hou, X. Bai, Y. Nie, H. Qian, T. Xia, R. Lai, G. Yu and M. Ju, *ACS Sustainable Chem. Eng.*, 2022, **10**, 1986-1993.
- S13. H. Huang, X. G. Meng, W. W. Yu, L. Y. Chen and Y. Y. Wu, *ACS Omega*, 2021, **6**, 19860-19866.
- S14. S. Saravanamurugan, M. Paniagua, J. A. Melero and A. Riisager, *J. Am. Chem. Soc.*, 2013, **135**, 5246-5249.
- S15. S. An, D. Kwon, J. Cho and J. C. Jung, *Catalysts*, 2020, **10**, 1236.
- S16. M. S. Rahaman, S. Tulaphol, A. Hossain, J. B. Jasinski, S. B. Lalvani, M. Crocker, T. Maihom and N. Sathitsuksanoh, *ChemCatChem*, 2022, **14**, e202200129.

- S17. M. D. d. Mello and M. Tsapatsis, *ChemCatChem*, 2018, **10**, 2417–2423.
- S18. L. Ren, Q. Guo, P. Kumar, M. Orazov, D. Xu, S. M. Alhassan, K. A. Mkhoyan, M. E. Davis and M. Tsapatsis, *Angew Chem Int Ed Engl*, 2015, **54**, 10848-10851.
